# Supplementary material for: BMSC-Derived Exosomes Alleviate Sepsis-Associated Acute Respiratory Distress Syndrome by Activating the Nrf2 Pathway to Reverse Mitochondrial Dysfunction
Source: Hindawi journal article supplement (doi:10.1155/2023/7072700), 2023-03-31

A

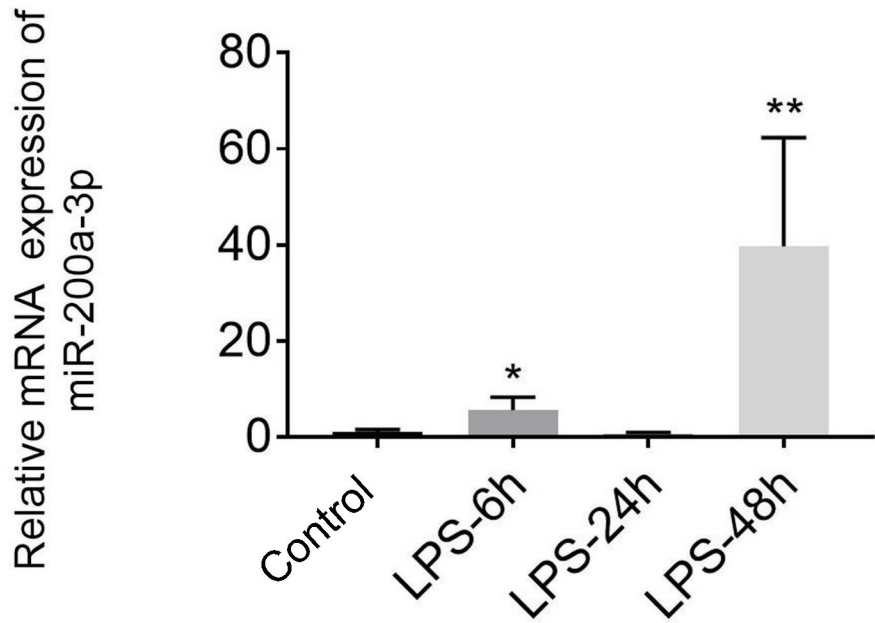

B

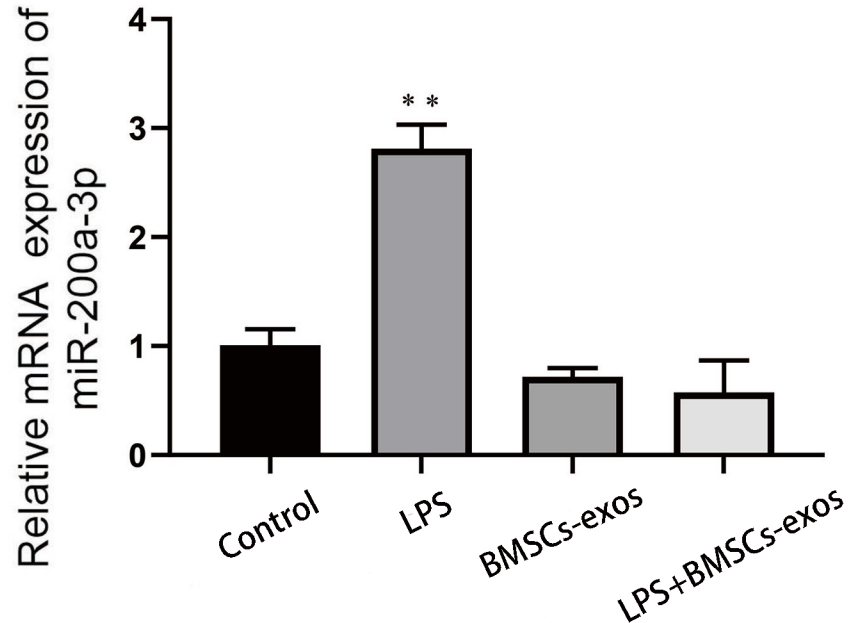

Supplement: f1 [file 7072700.f1.pdf]
